# Supplementary material
Source: Springer Nature journal article supplement (https://www.springermedizin.de/resource/supplementary/12963_2011_152_MOESM10_ESM.pdf/9572768)

# Acute Myocardial Infarction

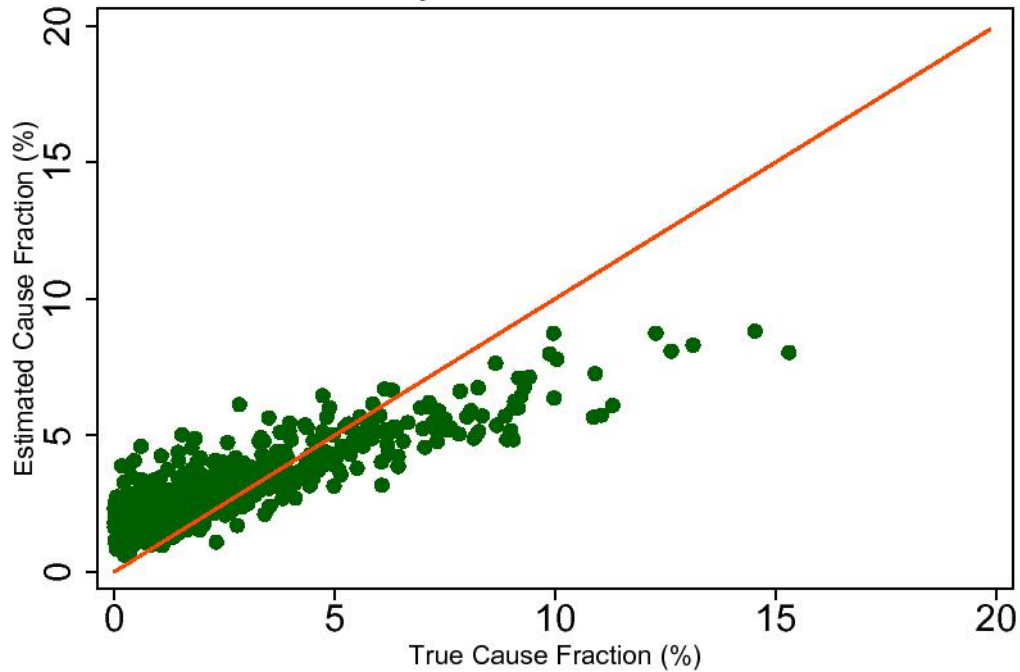

Supplement: MOESM10 [file 9572768]
